# Supplementary material for: Dietary patterns in rural and metropolitan Australia: a cross-sectional study exploring dietary patterns, inflammation and association with cardiovascular disease risk factors
Source: HighWire-hosted journal article supplement (doi:10.1136/bmjopen-2022-069475), 2023-06-01
Supplement: bmjopen-2022-069475supp001_data_supplement.pdf [file bmjopen-2022-069475supp001_data_supplement.pdf]

**Supplementary table 1: REGARDS food groupings and Aus Food codes**

| <b>Food Group Name</b>  | <b>Individual Foods</b>                                       | <b>Aus Food codes</b>                                                                                      | <b>New Stata var (all lower)</b> |
|-------------------------|---------------------------------------------------------------|------------------------------------------------------------------------------------------------------------|----------------------------------|
| 1. 100% fruit juice     | orange juice, fruit juice                                     | 11301, 11302, 11303                                                                                        | fruit_juice                      |
| 2. Added fats           | shortening, lard, vegetable oil, olive oil, gravy, mayonnaise | Fats and oils (14)<br>Mayonnaise (23301)<br>Gravy 231                                                      | added_fats                       |
| 3. Beans                | baked beans, refried beans, tofu, meat substitutes            | 25201 (beans and pulses, baked beans included)<br>20601 meat substitutes                                   | beans                            |
| 4. Beer                 | beer including light beer and non-alcoholic                   | 291                                                                                                        | beer                             |
| 5. Bread                | white bread, biscuits, bagels, cornbread                      | 122 (all breads/regular)<br>12201 ( breads/bread rolls/ white)                                             | White_bread                      |
| 6. Bread - Whole Grain  | dark bread                                                    | 12204 (mixed grain breads)                                                                                 | Wholegrain_bread                 |
| 7. Butter               | Butter                                                        | Butters (141)<br>Butter (14101)                                                                            | butter                           |
| 8. Candy                | candy (not chocolate)                                         | Lollies and confectionary<br>28401<br>Intensely sweetened- 28404<br>28405 'other confectionary'            | candy                            |
| 9. Cereal               | cold cereals and cooked cereals                               | 125 (cereal and cereal products)<br>12505 wheat based cereal                                               | cereal                           |
| 10. Cereal - High Fiber | bran and high fiber cereals                                   | 12511 (breakfast cereal, mixed grains )<br>12512 ( mixed grain)<br>12513 (mixed grain with fruit)<br>12506 | high_fiber_cereals               |
| 11. Chinese food        | Chinese dishes                                                | Beef, fish, chicken, veg stir fries with rice/noodles<br>15602009<br>15603007<br>15603008                  | Chinese_dish                     |

|                         |                                         |                                                                                                                                                                                                                                                          |                            |
|-------------------------|-----------------------------------------|----------------------------------------------------------------------------------------------------------------------------------------------------------------------------------------------------------------------------------------------------------|----------------------------|
|                         |                                         | 15603009<br>15603010<br>15603011<br>15603012<br>15603013<br>15603014<br>18702015<br>18702016<br>18702017<br>18702018<br>18702019<br>18902020<br>18902021<br>18902022<br>18902023<br>18902024<br>18902025<br>24901023<br>24901024<br>24901025<br>24901026 |                            |
| 12. Chocolate           | chocolate                               | 281 (all)<br>28101 (unfilled)                                                                                                                                                                                                                            | Chocolate                  |
| 13. Coffee              | coffee                                  | 112<br>12201                                                                                                                                                                                                                                             | coffee                     |
| 14. Condiments          | salsa, ketchup, mustard, barbecue sauce | 23103 (savory sauces not<br>tomato based)<br>23104 (tomato sauces)                                                                                                                                                                                       | condiments                 |
| 15. Desserts            | cookies, cakes, pies                    | 131 (all sweet biscuits),<br>133- all sweet cakes                                                                                                                                                                                                        | swcookies_cakes_biscs_pies |
| 16. Eggs and egg dishes | eggs                                    | 171- eggs, chicken eggs-<br>17101                                                                                                                                                                                                                        | eggs                       |
| 17. Fish                | non-fried fish, tuna                    | 15                                                                                                                                                                                                                                                       | fish                       |
| 18. Fried food          | fried chicken, fried fish               | 12307 fried bread<br>13406 fried pastries                                                                                                                                                                                                                | Fried_food                 |

|                    |                           |                                                                                                                                                                  |                |
|--------------------|---------------------------|------------------------------------------------------------------------------------------------------------------------------------------------------------------|----------------|
|                    |                           | 24102002<br>15501039                                                                                                                                             |                |
| 19. Fried potatoes | French fries              | 24102                                                                                                                                                            | Fried_chips    |
| 20. Fruit          | fruits                    | 16                                                                                                                                                               | fruit          |
| 21. High-fat dairy |                           | 193-cream<br>19401- cheeses reg fat<br>19406-processed<br>19501- high fat dessert frozen<br>19506<br>19507<br>19508<br>19601<br>19701<br>19702<br>19801<br>19802 | High_fat_dairy |
|                    | cheese, cream, ice cream  |                                                                                                                                                                  |                |
| 22. Liquor         |                           | all alcohol/spirits (not wine<br>and beer) 293<br>294 ciders/perry<br>295                                                                                        | liquor         |
|                    | liquor                    |                                                                                                                                                                  |                |
| 23. Low-fat dairy  |                           | 19402- reduced fat hard<br>cheeses<br>19404- soft cheeses<br>19407<br>19503<br>19506<br>19602<br>19803<br>19804                                                  | Low_fat_dairy  |
|                    | low-fat cheese, ice cream |                                                                                                                                                                  |                |
| 24. Margarine      | margarine                 | 146- Margarine and table<br>spreads                                                                                                                              | Margarine      |
| 25. Mexican dishes | tacos, burritos           | 13507                                                                                                                                                            | mexican        |

|                               |                                                               |                                                                                                                                                                         |                     |
|-------------------------------|---------------------------------------------------------------|-------------------------------------------------------------------------------------------------------------------------------------------------------------------------|---------------------|
|                               |                                                               | 13508                                                                                                                                                                   |                     |
| 26. Milk alternatives         | non-dairy creamer, rice milk, soy milk                        | 201- all dairy substitutes<br>Or 5 digits:<br>20101<br>20102<br>20103<br>20104<br>20105<br>20106 (nut and rice milks etc)<br>20201<br>20202                             | Non_dairy_milk      |
| 27. Milk - High-fat           | whole and 2% milk                                             | 19101 , 19102 and 19801 full<br>fat flavoured<br>19802                                                                                                                  | High_fat_milk       |
| 28. Milk - Low-fat            | non-fat and 1% milk                                           | 19103, 19104, 19105                                                                                                                                                     | Low_fat_milk        |
| 29. Miscellaneous<br>sugar    | jelly, jam, syrup, sugar in coffee/tea                        | 27301001<br>27301002<br>27301003<br>27301004<br>27301005<br>27301006<br>27301007<br>27201-jams<br>27203<br>27204<br>27205<br>27101 (added sugar)<br>27102 (syrup/honey) | Added_sugar_spreads |
| 30. Mixed dishes<br>with meat | mixed dishes with beef, pork, or chicken; chili<br>with beans | 187 (all mixed with meat as<br>major component)                                                                                                                         | Mixed_meat_dish     |
| 31. Organ meat                | liver, gizzard, neckbones, chitlins                           | 18401<br>18402<br>18403<br>18404<br>18405                                                                                                                               | Organ_meat          |

|                               |                                                                    |                                                                                                     |                 |
|-------------------------------|--------------------------------------------------------------------|-----------------------------------------------------------------------------------------------------|-----------------|
| 32. Pasta dishes              | spaghetti, other pasta, macaroni and cheese, other cheese dishes   | 13509                                                                                               | Pasta_dish      |
| 33. Pizza                     | pizza                                                              | 13501                                                                                               | Pizza           |
| 34. Potatoes                  | white potatoes, baked or mashed but not fried                      | 24101                                                                                               | Potatoes        |
| 35. Poultry                   | chicken (not fried)                                                | 18301 (all chicken) (has boiled/steamed/fried/roast all grouped together by section of the chicken) | Poultry         |
| 36. Processed meats           | hot dogs, bacon, sausage, ham, lunch meat                          | 18501<br>18502<br>18503<br>18601<br>18602<br>18603<br>18604<br>18605<br>18606                       | Proc_meats      |
| 37. Red meat                  | beef, hamburger, pork, ribs, veal                                  | 18103, 18101,18102                                                                                  | Red_meat        |
| 38. Refined grains            | rice, tortillas, crackers                                          | 26401 (crackers), 26301, 12102, 13201                                                               | Refined_grains  |
| 39. Salad dressing/sauces     | salad dressing                                                     | 233                                                                                                 | Salad_dressing  |
| 40. Salty snacks              | salty snacks, chips, popcorn                                       | 26202, 26201,                                                                                       | Salty_snacks    |
| 41. Seeds, nuts               | peanuts, other nuts, peanut butter                                 | 22201, 22202,22204                                                                                  | Seeds_nuts      |
| 42. Shell fish                | oysters and shellfish                                              | 15202                                                                                               | Shell_fish      |
| 43. Soda                      | soft drinks                                                        | 11702                                                                                               | soda            |
| 44. Soup                      | vegetable, bean, lentil, and other soups                           | 21102, 21302, 21402                                                                                 | soup            |
| 45. Sugar-sweetened beverages | drinks with sugar added (Kool aid) or containing some juice (Hi-C) | 115                                                                                                 | SSB             |
| 46. Sweet breakfast foods     | pancakes, waffles, doughnuts, pastries, breakfast/power bars       | 13401, 13601,13603, 28301                                                                           | Sweet_breakfast |
| 47. Tea                       | tea, iced tea                                                      | 111                                                                                                 | tea             |

|                             |                                                    |                                                                                                                                                       |                 |
|-----------------------------|----------------------------------------------------|-------------------------------------------------------------------------------------------------------------------------------------------------------|-----------------|
| 48. Vegetable - cruciferous | broccoli, coleslaw, cabbage, greens, collards      | 242                                                                                                                                                   | Vege_crucif     |
| 49. Vegetable - dark yellow | sweet potatoes                                     | 24302034, 24302035, 24302036, 24302037, 24302038, 24302039, 24302040, 24302041, 24302042, 24302043, 24302044, 24302045, 24302046, 24302047, 24302048, | Vege_darkyellow |
| 50. Vegetable - green leafy | green salad, spinach                               | 24401                                                                                                                                                 | Vege_leafy      |
| 51. Vegetable - other       | carrots, corn, green beans, peas, other vegetables | 24301,24402, 245, 24601, 247,248                                                                                                                      | Vege_other      |
| 52. Vegetable - tomato      | tomatoes, tomato juice, vegetable juice            | 246                                                                                                                                                   | Vege_tomato     |
| 53. Vegetable mixed dishes  | vegetable stew                                     | 24901                                                                                                                                                 | Vege_stew       |
| 54. Water                   | water                                              | 11701                                                                                                                                                 | Water           |
| 55. Wine                    | wine                                               | 292                                                                                                                                                   | Wine            |
| 56. Yogurt                  | yogurt including frozen yogurt                     | 192                                                                                                                                                   | yoghurt         |
